# Supplementary material
Source: PubMed Central journal article supplement (PMC5641679)

Stain Free Gel

Donor 306

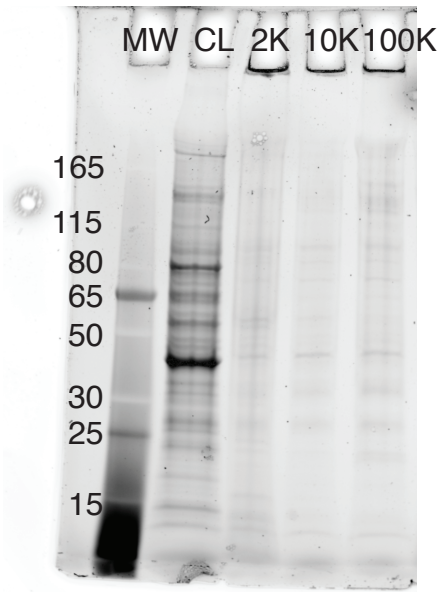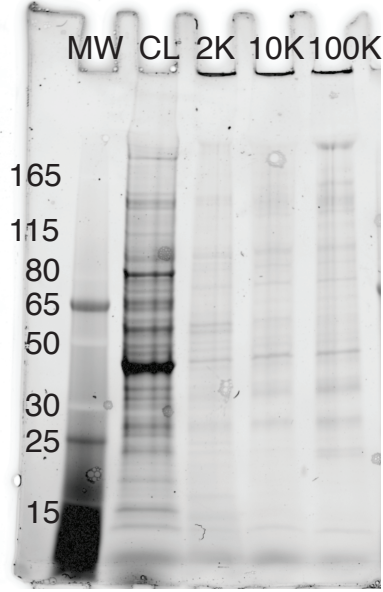

First hybridization: DC-SIGN

First hybridization: CD40

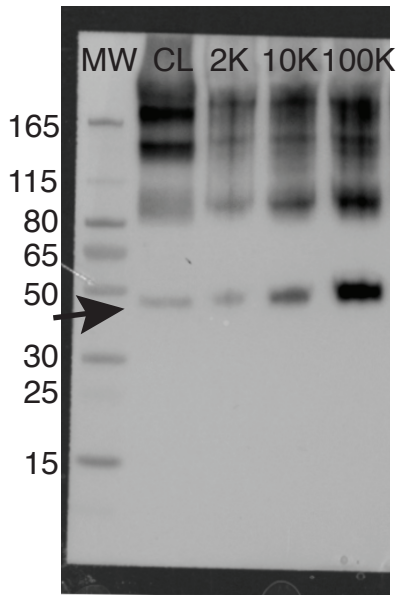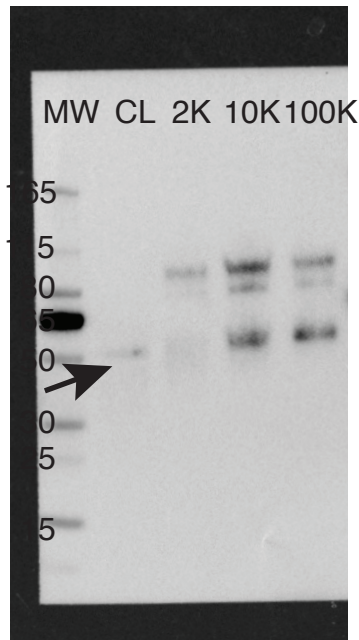

Second hybridization: MHC class II

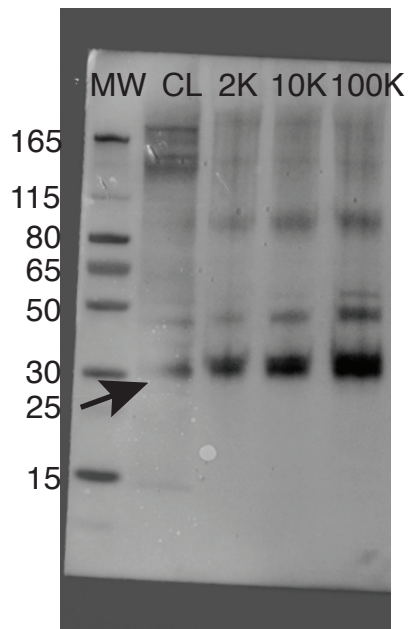

Supplement: EMBJ-36-3012-s003.pdf [file EMBJ-36-3012-s003.pdf]
