# Supplementary material
Source: PubMed Central journal article supplement (PMC5641679)

First hibridization: MHC class II

Donor 320

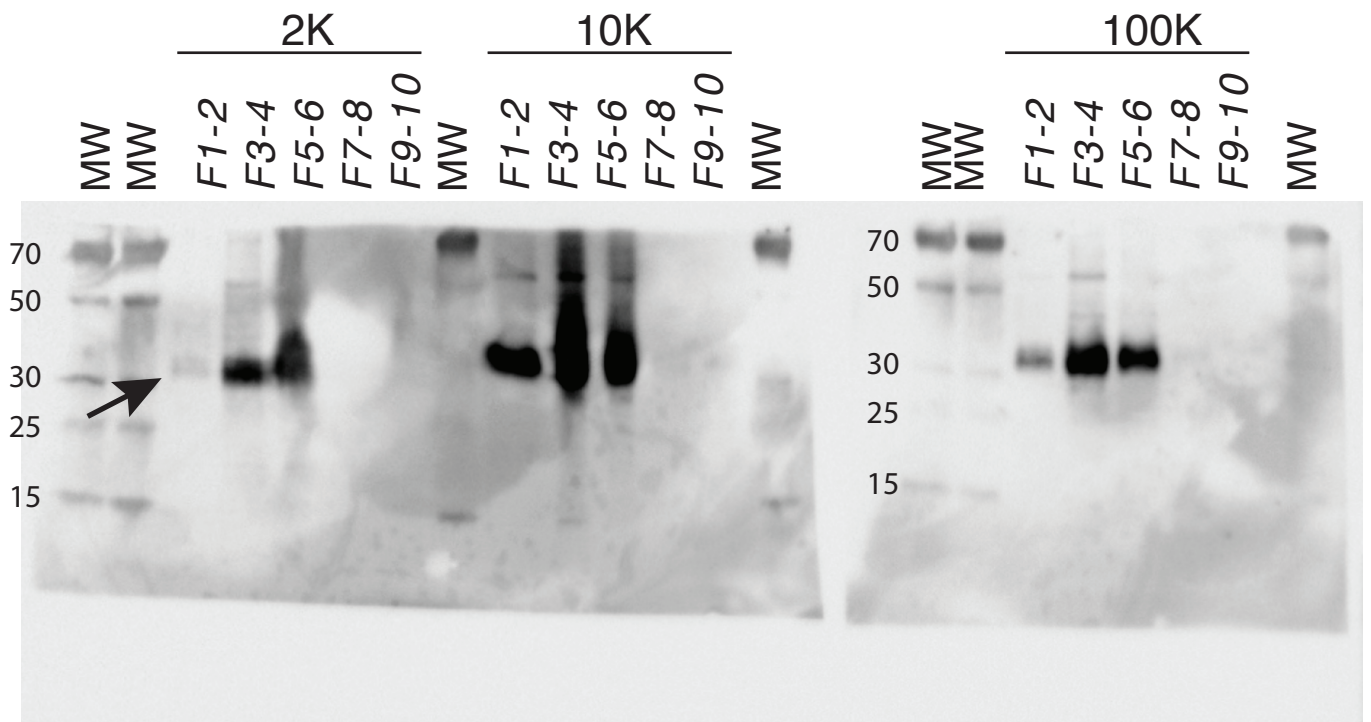

Second hibridization: CD9

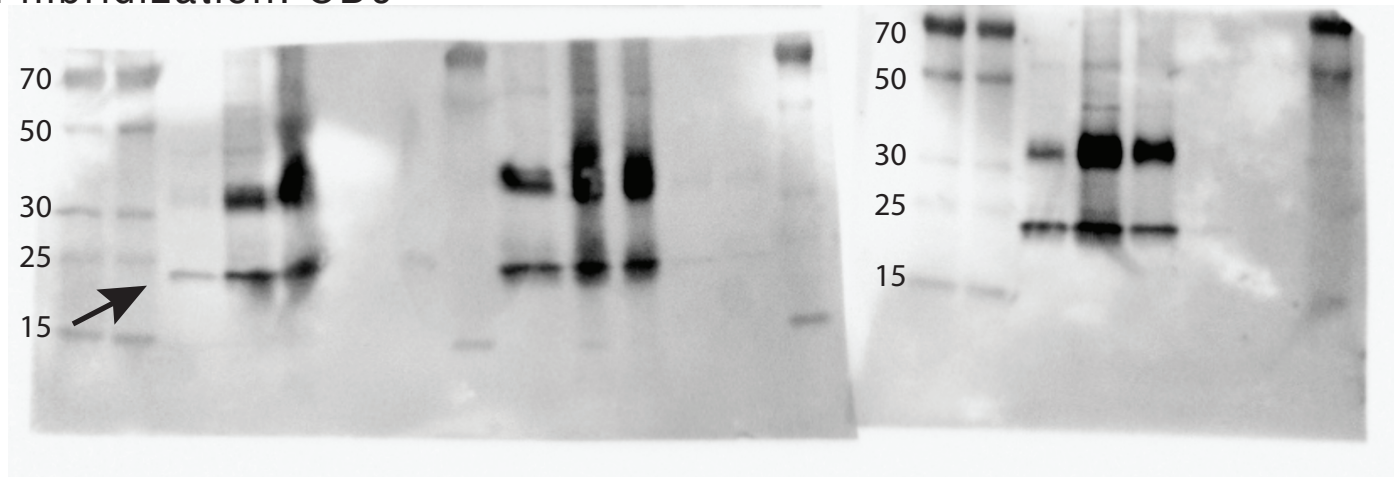

Supplement: EMBJ-36-3012-s002.pdf [file EMBJ-36-3012-s002.pdf]

Donor 341

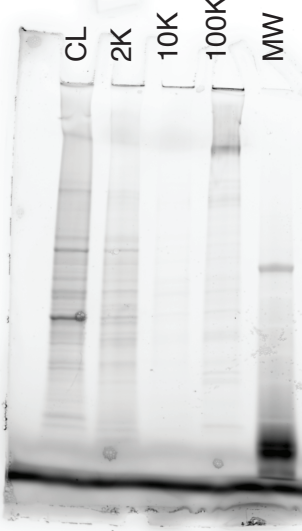

First hibridization: CD80

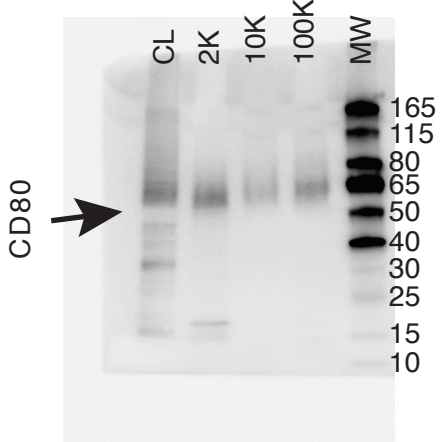

Second hibridization: MHC class II and CD9

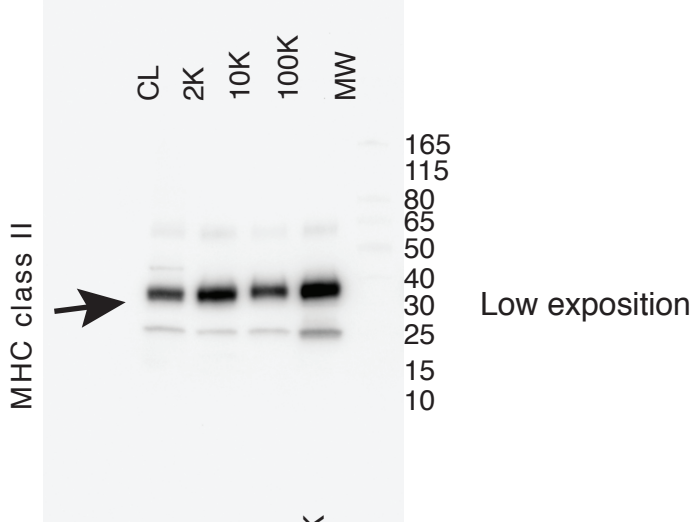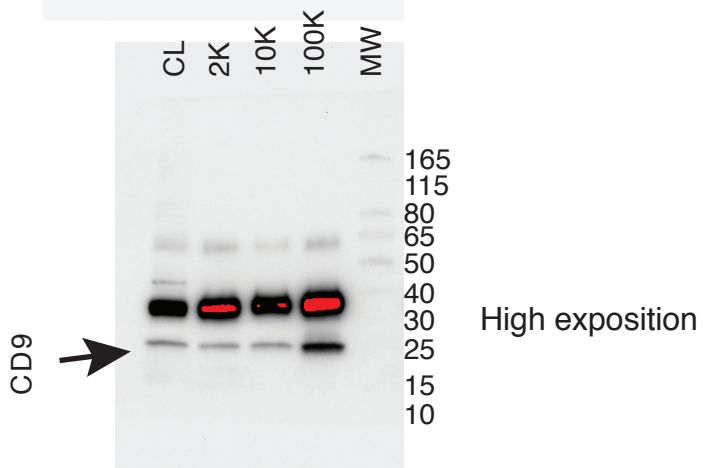

Supplement: EMBJ-36-3012-s004.pdf [file EMBJ-36-3012-s004.pdf]
